# Supplementary material for: Arguments against the Requirement of a Biological License Application for Human Pancreatic Islets: The Position Statement of the Islets for US Collaborative Presented during the FDA Advisory Committee Meeting
Source: MDPI journal article supplement (doi:10.3390/jcm10132878), 2021-06-29
Supplement: s1 [file s1]

## The “Islets for US” Collaborative

### Experts

Piotr Witkowski, MD, PhD  
Camillo Ricordi, MD

University of Chicago, Chicago, IL  
University of Miami, Miami, FL

#### American Society of Transplant Surgeons (ASTS)

|                          |                                    |
|--------------------------|------------------------------------|
| Marwan S. Abouljoud, MD  | President                          |
| Kenneth Andreoni, MD     | Council-At-Large                   |
| Robert Harland, MD       | Cellular Transplantation Committee |
| Lloyd Ratner, MD         | Immediate Past President           |
| Dixon B. Kaufman, MD PhD | Past President                     |
| Peter Stock, MD PhD      | Past President                     |
| Mark A. Hardy MD         | Past President                     |
| Jason Wellen, MD         |                                    |
| Peter L. Abrams, MD      |                                    |
| Marlon Levy, MD          |                                    |
| Chirag S. Desai, MD      |                                    |
| Michael Millis, MD       |                                    |
| Robert J. Stratta, MD    |                                    |
| Jonathan A. Fridell, MD  |                                    |
| Tomasz Kozlowski, MD     |                                    |
| Rolf N. Barth, MD        |                                    |
| Piotr J. Bachul, MD      |                                    |
| Jordan S. Pyda, MD, MPH  |                                    |
| Kumar Jayant, MD         |                                    |
| Martin Wijkstrom MD      |                                    |
| Joseph Leventhal MD PhD  |                                    |
| Shakir Hussain, MD       |                                    |
| Abbas Rana, MD           |                                    |
| Andrew Posselt MD        |                                    |

Henry Ford Hospital, Detroit, MI  
University of Florida, Gainesville, FL  
University of Arizona, Tucson, AZ  
Columbia University, New York, NY  
University of Wisconsin, Madison, WI  
UCSF, San Francisco, CA  
Columbia University, , New York, NY  
Washington University, St. Louis, MI  
MedStar Georgetown, Washington, DC  
Virginia Commonwealth, Richmond, VA  
Washington University, St. Louis, MI  
University of Chicago, Chicago, IL  
Wake Forest, Winston-Salem, NC  
Indiana University, Indianapolis, IN  
Oklahoma University, Oklahoma City, OK  
University of Chicago, Chicago, IL  
University of Chicago, Chicago, IL  
Harvard Medical School, Boston, MA  
University of Chicago, Chicago, IL  
University of Pittsburgh, Pittsburgh, PA  
Northwestern University, Chicago, IL  
Detroit Medical Center, Detroit, MI  
Baylor Medical College, Houston, TX  
UCSF, San Francisco, CA

American Diabetes Association (ADA),

Experts in Diabetology and Islet Transplantation

|                                 |                           |
|---------------------------------|---------------------------|
| Louis Philipson, MD, PhD        | Immediate Past President, |
| John Buse, MD, PhD              | Past President            |
| R. Paul Robertson MD            | Past President            |
| Rodolfo Alejandro, MD           |                           |
| David Baidal, MD                |                           |
| Melena Bellin, MD,              |                           |
| Fouad Kandeel, MD, PhD          |                           |
| Jason Gaglia, MD                |                           |
| Raghavendra G. Mirmira, MD, PhD |                           |

University of Chicago, Chicago, IL,  
University of North Carolina, Chapel Hill  
University of Washington, Seattle, WA  
University of Miami, Miami, FL  
University of Miami, Miami, FL  
University of Minnesota, Minneapolis, MN  
City of Hope, Duarte, CA  
Harvard Medical School, Boston, MA  
University of Chicago, Chicago, IL

International Pancreas and Islet Transplantation Association

|                            |                 |
|----------------------------|-----------------|
| James F. Markmann, MD, PhD | President       |
| Raja Kandaswamy, MD        | President-Elect |
| Jon Odorico, MD,           | Past President  |

Harvard Medical School, Boston, MA  
University of Minnesota, Minneapolis, MN  
University of Wisconsin, Madison, WI

United Network for Organ Transplantation (UNOS)

|                          |                                              |
|--------------------------|----------------------------------------------|
| David Mulligan, MD       | President                                    |
| Yolanda Becker, MD       | Immediate Past President                     |
| Silke Niederhaus, MD,    | Chair_of Pancreas ad Islet Tx Committee      |
| Rachael C. Forbes, MD    | Vice Chair_of Pancreas ad Islet Tx Committee |
| Oyedolamu K. Olaitan, MD | Pancreas ad Islet Tx Committee               |

Yale University, New Haven, CT  
University of Chicago, Chicago, IL  
University of Maryland, Baltimore, MD  
Vanderbilt University, Nashville, TN  
Rush University, Chicago, IL

American Society of Transplantation

Michelle A. Josephson, MD  
Ling-Xin Chen, MD  
Michael Charlton, MD  
Xunrong Luo, MD PhD

University of Chicago, Chicago, IL  
UC Davis, Sacramento, CA  
University of Chicago, Chicago, IL  
Duke University Durham, NC

The Transplantation Society

John Fung, MD, PhD      Council

University of Chicago, Chicago, IL

American College of Surgeons

Beth Schrope, MD

Columbia University, New York, NY

Experts in Cellular Therapy

Yossi Schwartz, MD    Secretary , World Apheresis Association  
Amittha Wickrema, PhD  
Wanxing Cui, MD PhD

Columbia University, New York, NY  
University of Chicago, Chicago, IL  
Georgetown University, Washington DC

Islet Processing Experts

Karolina Golab, PhD  
Appakalai N. Balamurugan, PhD  
Greg Szot, MS

University of Chicago  
University of Cincinnati, Cincinnati, OH  
UCSF, San Francisco, CA

Drugs, Biologics, and Medical Device Development Advisor

Anthony J. Japour, MD

Legal Expert (FDA Regulations)

Gail Javitt, JD, MPH

M Eryk Nowicki JD

Anthony Japour & Associates

Medical and Scientific Consulting, Miami

John Hopkins University, Baltimore, MD

SWC Nowicki, Chicago, IL

**SUPPORTERS**

**“Your brilliant research ought not to be kept from US patients”**, September 1, 2019, STAT NEWS,  
commentary to Dr. Ricordi’s article “Transplanting islet cells can fix brittle diabetes. Why isn’t it available in the U.S.?”

**Donna Shalala**

Congresswoman, past President of University of Miami and the Clinton Foundation

The longest-service US Secretary of Health and Human Services in American history (1993-2001)

**The Cure Alliance**

non-profit organization helping accelerate potential cures from the laboratory to the bedside
